# Supplementary material for: Masculinities and violence: using latent class analysis to investigate the origins and correlates of differences between men in the cross-sectional UN Multi-country Study on men and violence in Asia and the Pacific
Source: PubMed Central journal article supplement (PMC7774029; doi:10.7189/jogh.10.020439), 2020-12
Supplement: jogh-10-020439-s001.pdf [file jogh-10-020439-s001.pdf]

**Table S1 Model fit criteria**

| classes | cov       | # free parameters | Log likelihood | AIC   | BIC   | adjBIC | entropy | Vuong-Lo_Mendell-Rubin LRT for k vs k-1 classes (LMR LR) | P value | Lo-Mendell-Rubin adjusted LRT (ALMR LR) | P value | Bootstrap LRT for k vs 2k-1 classes (BLRT) | P value * |
|---------|-----------|-------------------|----------------|-------|-------|--------|---------|----------------------------------------------------------|---------|-----------------------------------------|---------|--------------------------------------------|-----------|
| 2       | no        | 21                | -39324         | 78689 | 78840 | 78774  | 0.741   | -42406                                                   | 0.000   | 6104                                    | 0.000   | -42406                                     | 0.000     |
| 3       | no        | 32                | -38844         | 77751 | 77983 | 77881  | 0.613   | -39324                                                   | 0.000   | 950                                     | 0.000   | -39324                                     | 0.000     |
| 4       | no        | 43                | -38594         | 77274 | 77585 | 7749   | 0.595   | -38844                                                   | 0.000   | 494                                     | 0.000   | -38844                                     | 0.000     |
| 5       | no        | 54                | -38416         | 76939 | 77330 | 77158  | 0.648   | -38594                                                   | 0.000   | 354                                     | 0.000   | -38594                                     | 0.000     |
|         |           |                   |                |       |       |        |         |                                                          |         |                                         |         |                                            |           |
| 2       | country 1 | 22                | -39198         | 78439 | 78598 | 78528  | 0.749   | -42406                                                   | 0.000   | 6358                                    | 0.000   | -42406                                     | 0.000     |
| 5†      | country 1 | 58                | -37977         | 76071 | 76490 | 76306  | 0.692   | -38282                                                   | 0.000   | 603                                     | 0.000   | -38282                                     | 0.000     |

\*a significant P value indicates a significant improvement in model fit in the k class model compared to the k-1 class model

†One or more multinomial logit parameters were fixed to avoid singularity of the information matrix. The singularity is most likely because the model is not identified, or because of empty cells in the joint distribution of the categorical latent variables and any independent variables. The following parameters were fixed: parameter 58, c#4 on country1
